# Supplementary material for: Primary Power Analysis of a Global Electrification Scenario
Source: MDPI journal article supplement (doi:10.3390/su151914440), 2023-10-03
Supplement: s1 [file s1]

Archive with 1 entries (1 files):
- sustainability-2585410-supplementary.pdf
